# Supplementary material for: Clathrin-mediated endocytic signals are required for the regeneration of,as well as homeostasis in, the planarian CNS
Source: Oxford University Press journal article supplement (doi:10.1242/dev.02835), 2007-03-22

A

|      |            |            |            |            |             |             |      |
|------|------------|------------|------------|------------|-------------|-------------|------|
| 1    | MSNSVMPHIF | QEHFQLSTIG | INAACIGFST | LTMESDKFIC | VREKNGETSN  | VVIIDINDPA  | 60   |
| 61   | NPIRRPISAD | SAIMNPISKV | IALKAGKTLQ | IFNIELKSKM | KSHNLTEDVT  | FWKWISVNTI  | 120  |
| 121  | ALVTDNAVPH | WSMEGESSPV | KMFDRHSSL  | GCQIINYRCD | PSLKLWLILIG | ISAQQSRVVG  | 180  |
| 181  | AMQLYSVDRK | VSQPIEGHAT | AFAHVKLDGN | INPSTLFCFG | VRGVQGGKHL  | IIEVGTPTG   | 240  |
| 241  | NQFTFKAVD  | VMFPPEAAAD | FPVAMQTSNK | FNMIFLITKY | GYIHMYDIET  | GTCIYVNRIS  | 300  |
| 301  | SETIFVTAPY | EPTSGIIGVN | RKGQVLSVSV | EETIVSYIT  | NTLSLPDLAL  | RVATRSLNPG  | 360  |
| 361  | AEDLFVHKFN | NLFTSGQYSE | AAKAAASAPK | GILRTPQTIQ | RFQVQPTQSG  | QSPLLQYFGI  | 420  |
| 421  | LLDQGQLNKY | ESLELCRPVL | MQGKQQLLEK | WLKEDKLECS | EELGDIVKQS  | DPTLALSIVYL | 480  |
| 481  | RANVPQKVVO | CFAETGQFQK | IILYSKKVGF | TPDYVYLLRN | LMRINADQGL  | QFAQMLVQDD  | 540  |
| 541  | EPXVSDLDQI | VDVFMEQGLV | QQCTSFLLLA | LKNRNPSEAH | LQTRLLMMNL  | MHAPQVADAI  | 600  |
| 601  | MGNKMFTNYD | KAHIAQLCCK | AGLXQRALEH | YTDLYDIKRA | VVHTHLLNAE  | WLVNYFGCLS  | 660  |
| 661  | IDDSLECIKA | MLQANIROSL | QVCVQIASKY | HEQLGTSAIL | EIFXSFKSYE  | GLFYFLGSIV  | 720  |
| 721  | NFSQDTEVHF | KYIQAACKTG | QIKEVERICK | ESNFYEPDRV | KNFLKEAKLT  | DQLPLIIVCD  | 780  |
| 781  | RFDVVDLVL  | YLRYNQLQKY | IEIYVQKVN  | QRLPIVVGGL | LDVDCSDDVI  | KQLIMVVRGQ  | 840  |
| 841  | FNTDELVAEV | EKRNRLLKLL | PWLESRIHEG | SEEPATHNAL | AKIYIDSNNN  | PERFLKENQF  | 900  |
| 901  | YDSRVVGKYC | EKRDPHLACV | AYERGQCQDE | LIKVCNENSL | FKSEARYLVR  | RKDADLWAEV  | 960  |
| 961  | LGDANEYRRQ | LIDQVQVQAL | SETQDPEEIS | IAVRAFMTAD | MPNELIELLE  | KIVLDNSVFS  | 1020 |
| 1021 | DHRNLQNLII | LTAIKADKTR | VMEYITRLDN | YDAPDIANIA | ITNDLFEEAF  | AIFKKFEVNT  | 1080 |
| 1081 | SAVQVLIENI | KNLDRAYEFA | EKCNEPGVWS | QLALAQLENG | FIKEAVDSYL  | KAGDPSQYMK  | 1140 |
| 1141 | VVEAGKRENN | YEDLVRYLQM | ARKKARETFI | ETELAYAYAK | TNRLADLEEF  | ISGPNHANVT  | 1200 |
| 1201 | QVADRCFDEK | LYEAAKLLYN | NVSNYARLAI | TLVHLGEYQA | AVDSARKANS  | TRTWKEVCFA  | 1260 |
| 1261 | CVDNEEFRLA | QMSGMHIVVH | ADELEDLINY | YQDRGFEEEL | ITLLEAGLGL  | ERAHMGFMTE  | 1320 |
| 1321 | LAILYSKFKP | AKMREHLELF | WSRVNIPKVL | RASEQAHLWS | ELVFLYDKYE  | EFDNAILTMM  | 1380 |
| 1381 | NHATEAWREN | HFKDIITKVA | NIELYKAIN  | FYLNNKPLL  | NDLLNVLIIPR | LDHTRTVNYF  | 1440 |
| 1441 | MKVGQIPLVK | PYLRHVQQHN | NKTVNEALNS | LLIDEEDYEG | LRASIETYHN  | FDNIALAQKL  | 1500 |
| 1501 | EKHELIEFRR | IAAFLYKGNN | RYKQSVDLCK | RDKLYKDAMQ | YASESRDIEA  | AEDLLNWFLS  | 1560 |
| 1561 | EGLHDCFAAC | LFQCYDLLRP | DVVLEAAWRH | NIMDFAMPYI | IQVLFREYTEK | VDKLEKADAI  | 1620 |
| 1621 | RSTNEEKAEF | EHKPLLLREP | QLMLTAGPMG | IPNMYGSGPV | GPGFAPMPSM  | GGMPPQNGP   | 1680 |
| 1681 | FH         |            |            |            |             |             | 1682 |

B

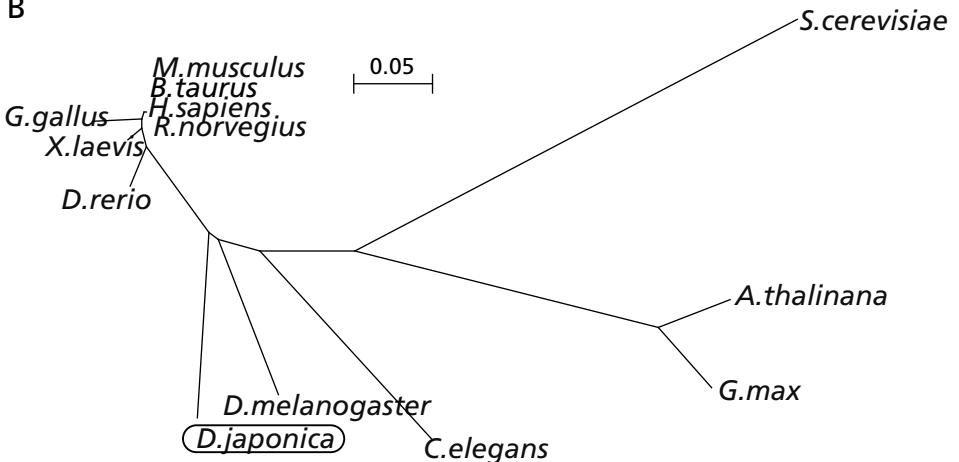

Supplement: dev02835figs1.pdf [file dev02835figs1.pdf]
