# Supplementary figures and images for: Clathrin-mediated endocytic signals are required for the regeneration of,as well as homeostasis in, the planarian CNS
Source: Oxford University Press journal article supplement (doi:10.1242/dev.02835), 2007-03-22

A

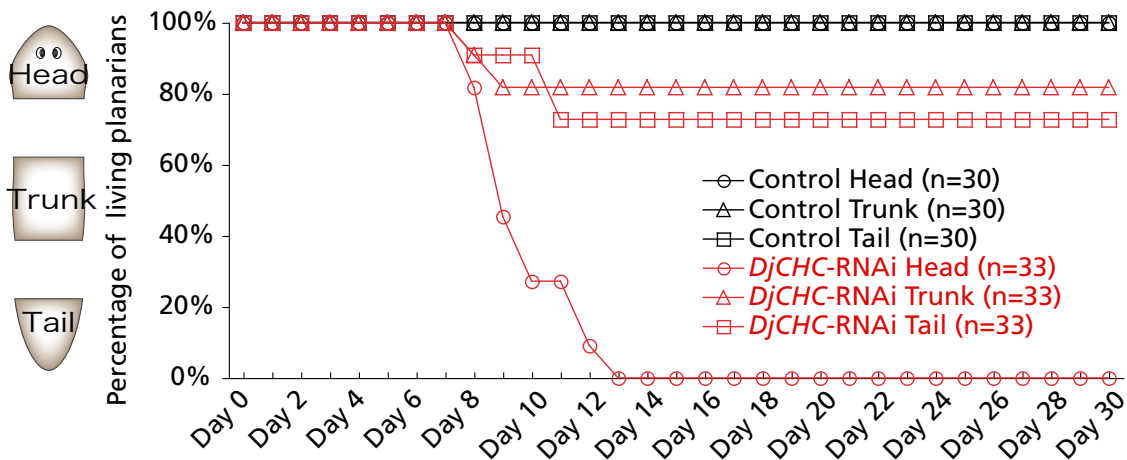

B

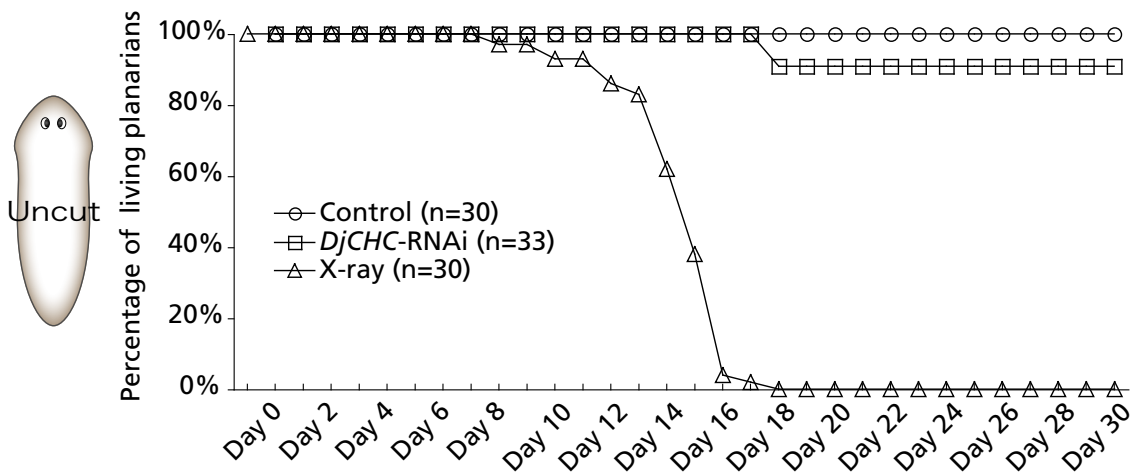

C

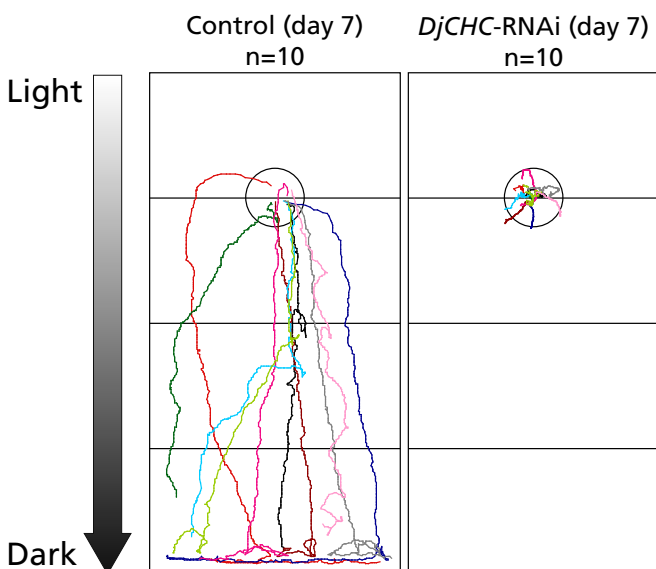

Supplement: dev02835figs2.pdf [file dev02835figs2.pdf]
